# Supplementary material for: A Framework of the Training Module for Untrained Observers in Usability Evaluation Motivated by COVID-19: Enhancing the Validity of Usability Evaluation for Children’s Educational Games
Source: Hindawi journal article supplement (doi:10.1155/2022/7527457), 2022-03-09
Supplement: f1 [file 7527457.f1.docx]

**Questionnaire**

- Mention your role as observer: Teacher/Instructor Guardian/Guide

***To what extent the following items of usability of game are rated based on your observation of users’ actions.***

**Learnability**

| **Construct Items** | *Very high (5)* | *High (4)* | *Medium (3)* | *Low (2)* | *Very low (1)* |
| --- | --- | --- | --- | --- | --- |
| Difficulty of selection of menu to start the game |  |  |  |  |  |
| Difficulty of command on navigational controls from one activity to another activity |  |  |  |  |  |
| Difficulty of level of completion of the task given to user |  |  |  |  |  |
| Difficulty of level of completion of the task within the time frame given to the user |  |  |  |  |  |
| The rate of errors committed while performing a task |  |  |  |  |  |
| Difficulty of fixation and scan path duration |  |  |  |  |  |
| Difficulty of selection of menu to start the game |  |  |  |  |  |

**Difficulty -of-Use**

| **Construct Items** | *Very high (5)* | *High (4)* | *Medium (3)* | *Low (2)* | *Very low (1)* |
| --- | --- | --- | --- | --- | --- |
| The rate of trouble to move from one activity to another activity |  |  |  |  |  |
| The amount of time spent on understanding a process (game step) |  |  |  |  |  |
| The amount of time spent on watching a process (game step) |  |  |  |  |  |
| The amount of time spent on understanding to pause the game |  |  |  |  |  |
| The amount of time spent on understanding to move from one level to another level. |  |  |  |  |  |

**Memorability**

| **Construct Items** | *Very high (5)* | *High (4)* | *Medium (3)* | *Low (2)* | *Very low (1)* |
| --- | --- | --- | --- | --- | --- |
| The amount of time spent on accomplishing the first level of the game in the 1st attempt |  |  |  |  |  |
| The amount of time spent on accomplishing the second level of the game in 2nd attempt |  |  |  |  |  |
| The amount of time difference between 1st attempt and 2nd attempt |  |  |  |  |  |
| The amount of time spent on understanding to pause the game |  |  |  |  |  |

**Enjoyment**

| **Construct Items** | *Very high (5)* | *High (4)* | *Medium (3)* | *Low (2)* | *Very low (1)* |
| --- | --- | --- | --- | --- | --- |
| The rate of concentration of the user |  |  |  |  |  |
| The rate of immersion of the user |  |  |  |  |  |
| The rate of distraction of the user from game |  |  |  |  |  |
| The rate of feeling sense of control over the game of the user. |  |  |  |  |  |
| The rate of motivation to play again. |  |  |  |  |  |
